# Supplementary material
Source: PubMed Central journal article supplement (PMC3272084)
Supplement: NIHMS336567-supplement-07.pdf [file NIHMS336567-supplement-07.pdf]

## Supplementary Table 1

PCR primers used in the present study

| <b>Primer</b> | <b>Sequence</b>         | <b>Application</b>   |
|---------------|-------------------------|----------------------|
| Bmp F2        | CAACTTGAGGGCAACATA      | ISH template; RT-PCR |
| Bmp R2        | GTCAGCGAGTAGTCTCATAG    | ISH template; RT-PCR |
| NADH-qPCRf1   | CAATGGTTGTTGCTGGAGTCTTT | RT-PCR               |
| NADH-qPCRr1   | CGCAGAAGTAGCCGCGAATAT   | RT-PCR               |
| TCTP F1       | GATGAGCTTTTCAGCGACA     | ISH template; RT-PCR |
| TCTP R1       | AAGGGCTGGGTGGTTTAG      | ISH template; RT-PCR |
| Wnt F3-cr     | ACCATCAGCCGCACAGAATA    | ISH template; RT-PCR |
| Wnt R3-cr     | GCACTTCTCCGTCACCGTTA    | ISH template; RT-PCR |
| Wnt F4        | ACTAAGGACCTACCCTCCAC    | ISH template         |
| Wnt R4        | ATGAATACCTATCCCTGCTAC   | ISH template         |
